# Supplementary material for: Flow synthesis and multidimensional parameter screening enables exploration and optimization of copper oxide nanoparticle synthesis
Source: Royal Society of Chemistry journal article supplement (doi:10.1039/d4na00839a), 2024-12-03
Supplement: d4na00839a1.pdf [file d4na00839a1.pdf]

# Flow synthesis and multidimensional parameter screening allows exploration and optimization of copper oxide nanoparticle synthesis: Supplementary Information

## 1. RESIDENCE TIME DETERMINATION

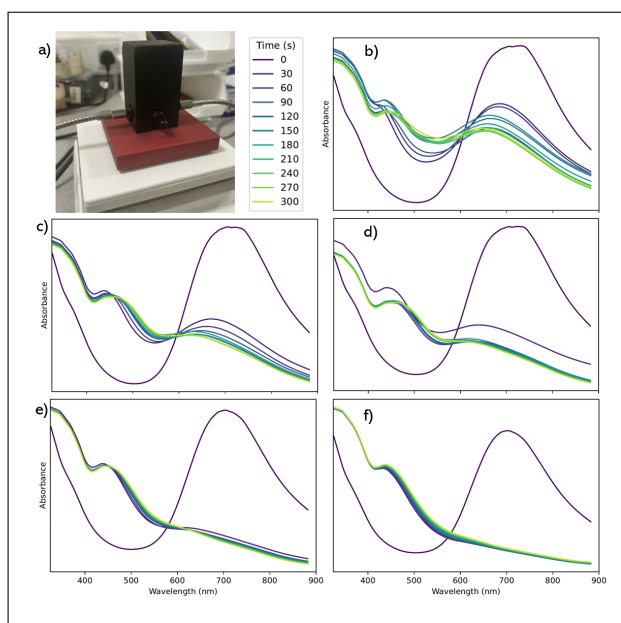

**Fig. S1.** (a) Apparatus for experiments to monitor the UV-vis absorbance spectra evolution of the transition of copper acetate following the addition of various molar ratios of NaOH/Cu<sup>2+</sup>: b) 1, c) 2, d) 4, e) 12 and f) 36

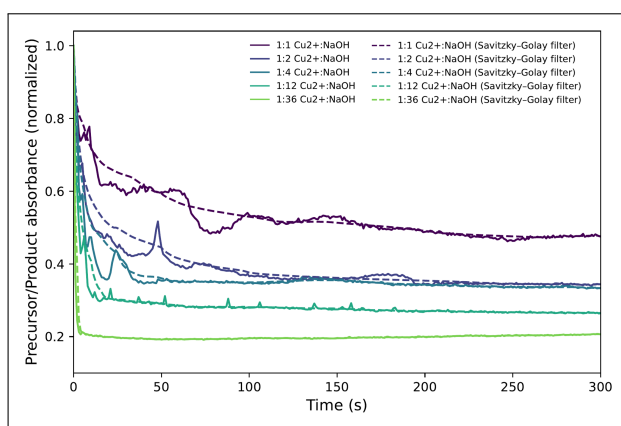

**Fig. S2.** Ratio of the intensity of product peak against the precursor peak over 300 seconds post-injection of NaOH. A Savitsky-Golay filter (dashed lines) was applied to smooth the data and clearly interpret the rate of change.

## 2. BATCH SYNTHESIS AND CHARACTERIZATION

### Precursor UV-vis absorbance data

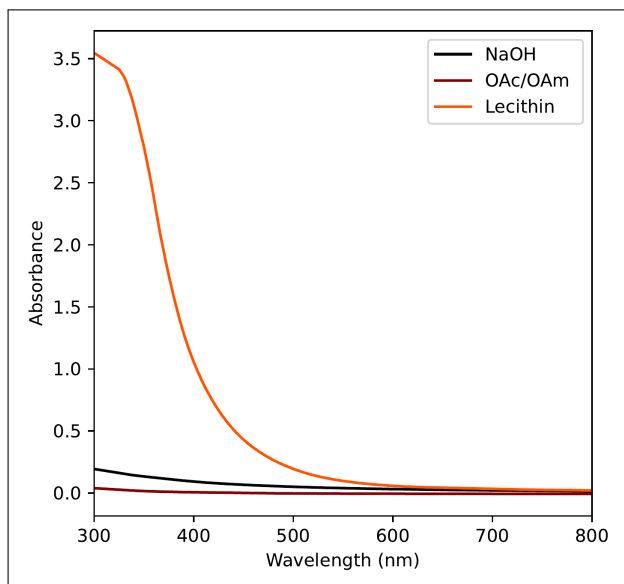

**Fig. S3.** UV-vis absorbance spectra for 0.5M NaOH, 0.15M lecithin and 0.15M oleic acid/oleylamine precursors in 1-octanol

### Synthesis parameters

**Table S1.** Corresponding precursor volumes for CuO batch experiments

| Cu(OAc) <sub>2</sub> (uL) | NaOH (uL) | Total Volume (uL) | Cu(OAc) <sub>2</sub> conc. (mM) | NaOH conc. (mM) |
|---------------------------|-----------|-------------------|---------------------------------|-----------------|
| 500                       | 500       | 1000              | 12.5                            | 12.5            |
| 500                       | 500       | 1000              | 12.5                            | 25              |
| 500                       | 500       | 1000              | 12.5                            | 50              |
| 500                       | 500       | 1000              | 12.5                            | 150             |
| 500                       | 500       | 1000              | 12.5                            | 450             |

NB: Concentrations are the relative concentration of precursors after mixing.

### Characterization

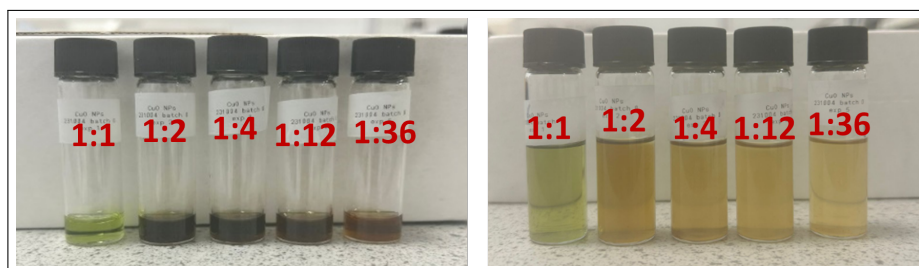

**Fig. S4.** Photograph of the as-prepared solutions after 5 minute reaction (pre-purification), synthesized under flask conditions pre- (L) and post- (R) dilution with 1-octanol.

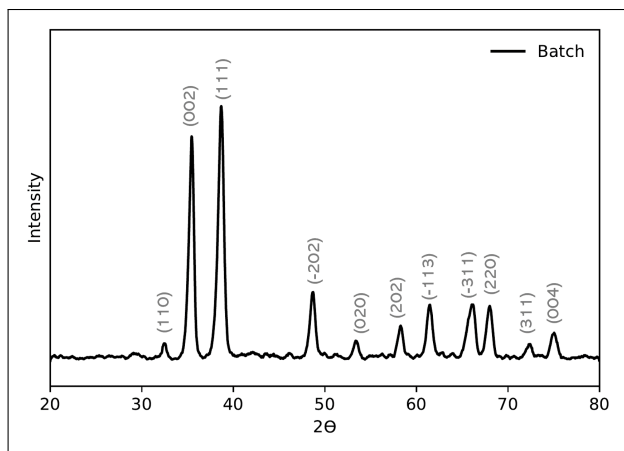

**Fig. S5.** XRD spectra for the CuO nanoparticles synthesised using a 1:12 Cu<sup>2+</sup>: NaOH ratio under batch conditions.

The Debye Scherrer equation can be used to estimate the crystallite grain size from the XRD spectra [1]:

$$D = \frac{K\lambda}{\beta \cos \theta} \quad (S1)$$

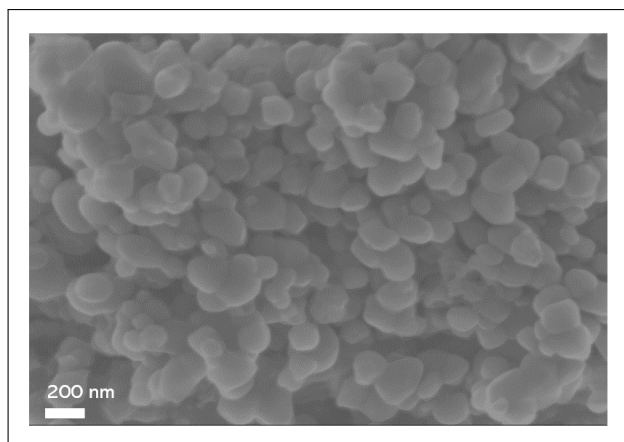

**Fig. S6.** SEM image for the CuO nanoparticles synthesised using a 1:12 Cu<sup>2+</sup>:NaOH ratio under batch conditions.

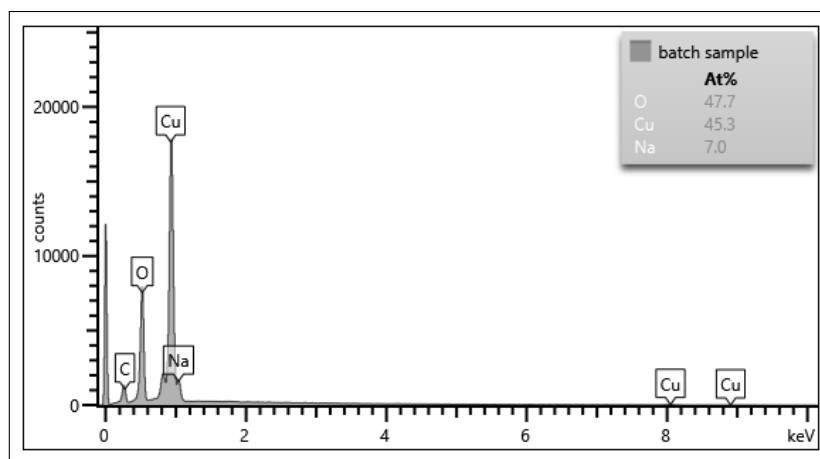

**Fig. S7.** EDS Spectra for the CuO nanoparticles synthesised using a 1:12 Cu<sup>2+</sup>:NaOH ratio under batch conditions.

### 3. FLOW SYNTHESIS AND CHARACTERIZATION

#### Synthesis parameters

**Table S2.** Corresponding flow rates for CuO flow experiments

| Cu(OAc) <sub>2</sub> (uL/min) | NaOH (uL/min) | 1-Octanol (uL/min) | Cu(OAc) <sub>2</sub> conc. (mM) | NaOH conc. (mM) |
|-------------------------------|---------------|--------------------|---------------------------------|-----------------|
| 50                            | 1.25          | 48.75              | 12.5                            | 12.5            |
| 50                            | 2.5           | 47.5               | 12.5                            | 25              |
| 50                            | 5             | 45                 | 12.5                            | 50              |
| 50                            | 15            | 35                 | 12.5                            | 150             |
| 50                            | 45            | 5                  | 12.5                            | 450             |

NB: Concentrations are the relative concentration of precursors after mixing.

#### Characterization

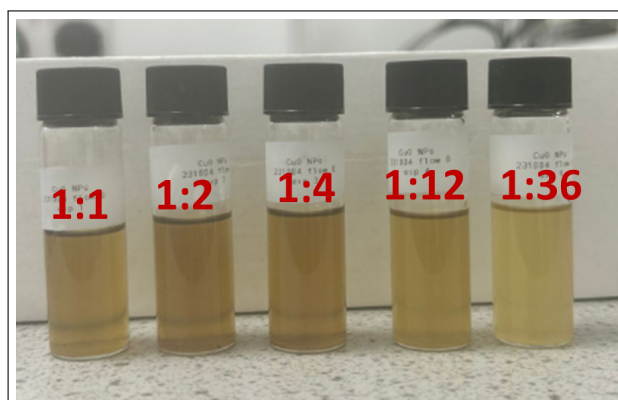

**Fig. S8.** Photograph of the as-prepared solutions after 5 minute reaction (pre-purification), synthesized under flow conditions and post-dilution with 1-octanol.

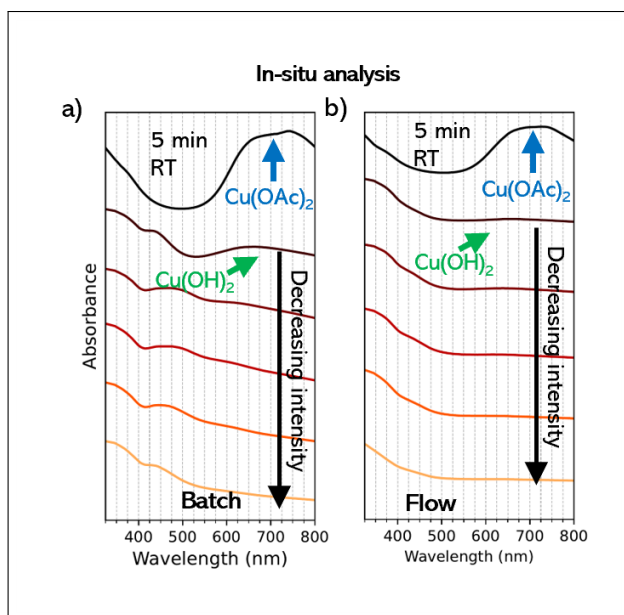

**Fig. S9.** Final UV-vis absorption spectrum for the solutions after 5 min reaction time (RT) upon the addition of various molar ratios of NaOH for a) batch and b) flow conditions

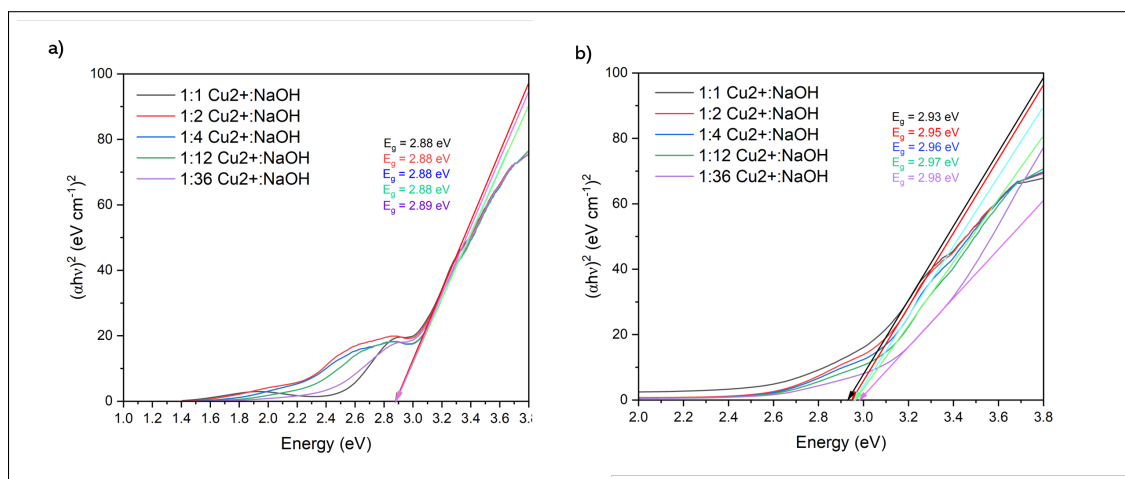

**Fig. S10.** Tauc plots and estimated band gaps for various  $\text{Cu}^{2+}:\text{NaOH}$  ratios for CuO NPs synthesized under a) batch and b) flow conditions

The Tauc equation can be used to estimate the band gap energy from the UV-vis spectroscopy data:

$$(\alpha h\nu)^{1/n} = A(h\nu - E_g) \quad (\text{S2})$$

where  $\alpha$  is absorption coefficient being a function of wavelength  $\alpha(\lambda)$ ,  $h$  is Planck constant,  $E_g$  is an optical band gap of a semiconductor,  $\nu$  is frequency,  $A$  is proportionality constant, and  $n$  is Tauc coefficient. This study investigated the direct (allowed) transitions, where  $n = 1/2$ . [2]

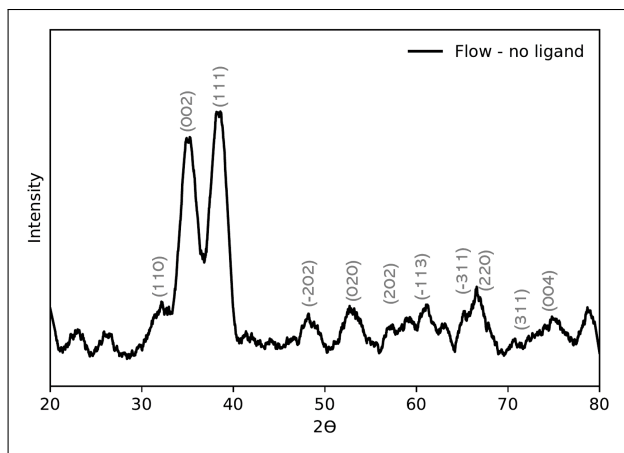

**Fig. S11.** XRD pattern for the CuO nanoparticles synthesised using a 1:12 Cu<sup>2+</sup>: NaOH ratio under flow conditions.

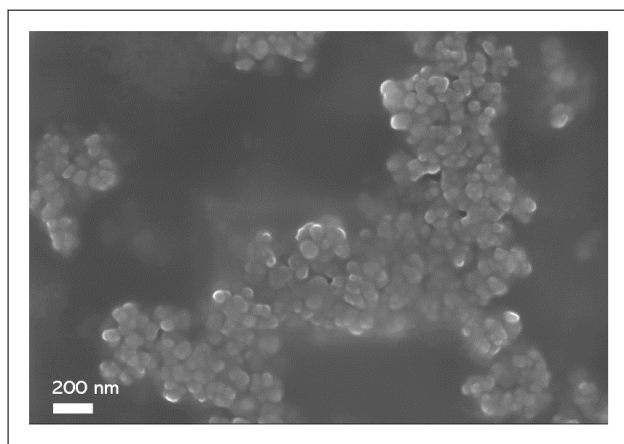

**Fig. S12.** SEM image for the CuO nanoparticles synthesised using a 1:12 Cu<sup>2+</sup>:NaOH ratio under flow conditions.

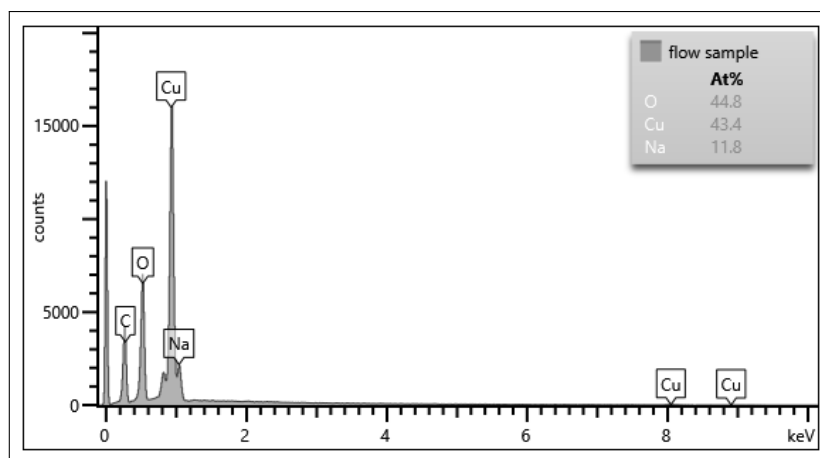

**Fig. S13.** EDS Spectra for the CuO nanoparticles synthesised using a 1:12 Cu<sup>2+</sup>:NaOH ratio under flow conditions.

#### 4. MAPPING THE BAND GAP RESPONSE TO VARYING LECITHIN AND PRECURSOR CONCENTRATIONS

##### Parameters

**Table S3. Corresponding flow rates for the parameter scan experiments**

| Cu(OAc) <sub>2</sub> (uL/min) | NaOH (uL/min) | Ligand (uL/min) | Octanol (uL/min) | NaOH/Cu <sup>2+</sup> | Ligand conc. (mM) |
|-------------------------------|---------------|-----------------|------------------|-----------------------|-------------------|
| 50                            | 3.125         | 0               | 46.875           | 5                     | 0                 |
| 50                            | 3.125         | 0.833           | 46.042           | 5                     | 1.25              |
| 50                            | 3.125         | 4.167           | 42.708           | 5                     | 6.25              |
| 50                            | 3.125         | 8.33            | 38.545           | 5                     | 12.5              |
| 50                            | 3.125         | 12.5            | 34.375           | 5                     | 18.75             |
| 50                            | 7.8125        | 0               | 42.1875          | 12.5                  | 0                 |
| 50                            | 7.8125        | 0.833           | 41.3545          | 12.5                  | 1.25              |
| 50                            | 7.8125        | 4.167           | 38.0205          | 12.5                  | 6.25              |
| 50                            | 7.8125        | 8.33            | 33.8575          | 12.5                  | 12.5              |
| 50                            | 7.8125        | 12.5            | 29.6875          | 12.5                  | 18.75             |
| 50                            | 12.5          | 0               | 37.5             | 20                    | 0                 |
| 50                            | 12.5          | 0.833           | 36.667           | 20                    | 1.25              |
| 50                            | 12.5          | 4.167           | 33.333           | 20                    | 6.25              |
| 50                            | 12.5          | 8.33            | 29.17            | 20                    | 12.5              |
| 50                            | 12.5          | 12.5            | 25               | 20                    | 18.75             |
| 50                            | 17.1875       | 0               | 32.8125          | 27.5                  | 0                 |
| 50                            | 17.1875       | 0.833           | 31.9795          | 27.5                  | 1.2495            |
| 50                            | 17.1875       | 4.167           | 28.6455          | 27.5                  | 6.2505            |
| 50                            | 17.1875       | 8.33            | 24.4825          | 27.5                  | 12.495            |
| 50                            | 17.1875       | 12.5            | 20.3125          | 27.5                  | 18.75             |
| 50                            | 21.875        | 0               | 28.125           | 35                    | 0                 |
| 50                            | 21.875        | 0.833           | 27.292           | 35                    | 1.2495            |
| 50                            | 21.875        | 4.167           | 23.958           | 35                    | 6.2505            |
| 50                            | 21.875        | 8.33            | 19.795           | 35                    | 12.495            |
| 50                            | 21.875        | 12.5            | 15.625           | 35                    | 18.75             |

NB: Concentrations are the relative concentration of precursors after mixing.

## Characterization

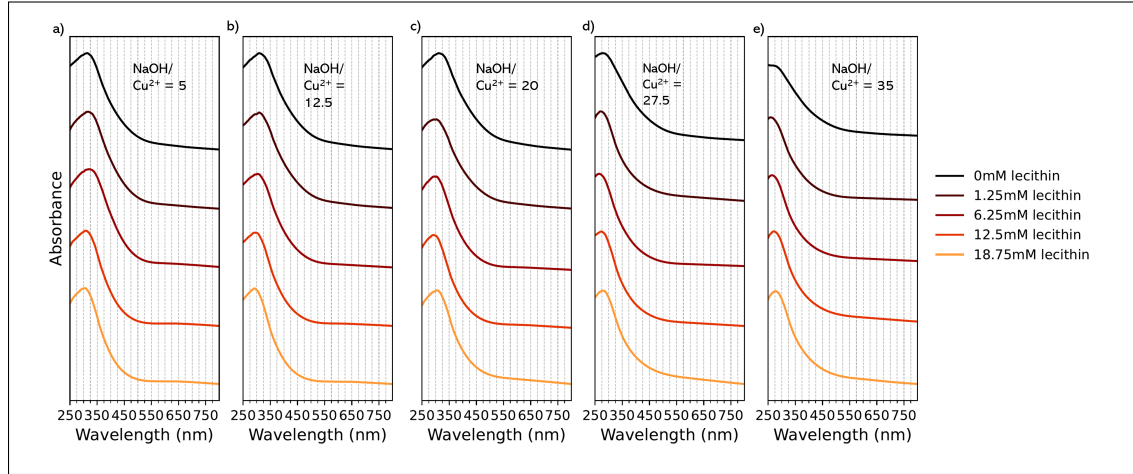

**Fig. S14.** UV-vis absorbance spectra for various concentrations of lecithin for NaOH/Cu<sup>2+</sup> ratios of a) 5, b) 12.5, c) 20, d) 27.5 and e) 35

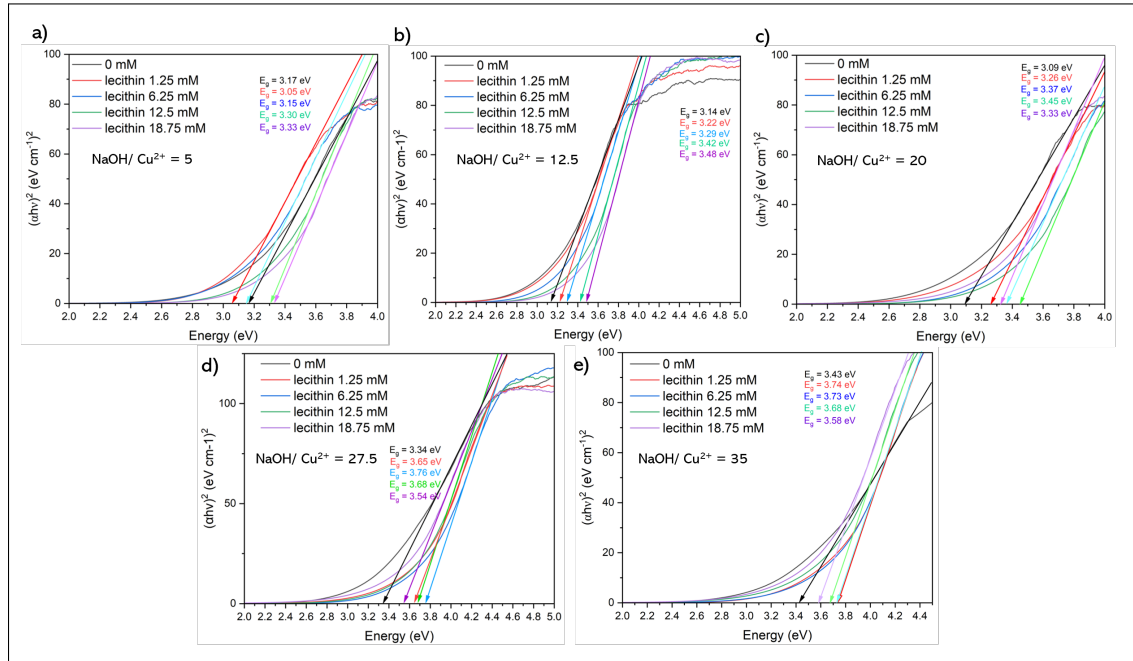

**Fig. S15.** Tauc plots and estimated band gaps for various concentrations of lecithin for NaOH/Cu<sup>2+</sup> ratios of a) 5, b) 12.5, c) 20, d) 27.5, and e) 35



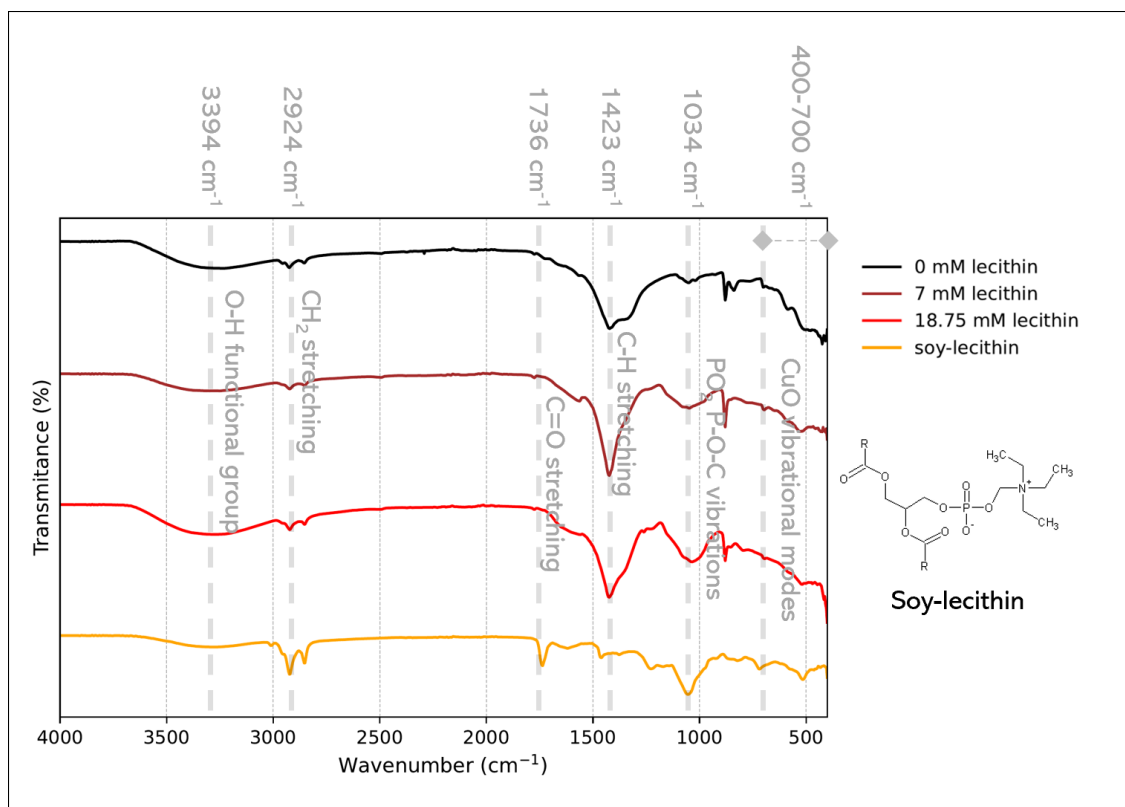

**Fig. S16.** FT-IR spectra for various concentrations of lecithin synthesized under flow conditions

### Stability Measurements

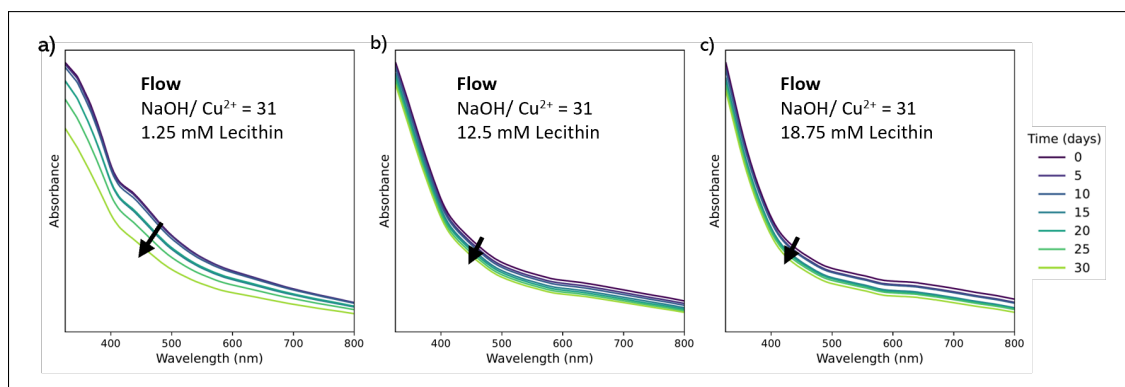

**Fig. S17.** Evolution of UV-Vis absorption spectra of the colloidal suspension of samples of CuO synthesized in flow recorded over 30 days for lecithin concentrations of a) 1.25 mM, b) 6.25 mM, and c) 18.75 mM.

### REFERENCES

1. A. O. Bokuniaeva and A. S. Vorokh, "Estimation of particle size using the Debye equation and the Scherrer formula for polyphasic TiO<sub>2</sub> powder," *J. Phys.: Conf. Ser.* **1410**, 012057 (2019).
2. Haryński, A. Olejnik, K. Grochowska, and K. Siuzdak, "A facile method for Tauc exponent and corresponding electronic transitions determination in semiconductors directly from UV-Vis spectroscopy data," *Opt. Mater.* **127**, 112205 (2022).
